# Supplementary material for: Enhanced energy storage properties of a novel lead-free ceramic with a multilayer structure
Source: Royal Society of Chemistry journal article supplement (doi:10.1039/c8tc02368a), 2018-01-01
Supplement: c8tc02368a1.pdf [file c8tc02368a1.pdf]

## **Supplementary Informations:**

### **Enhanced energy storage properties in a novel lead-free ceramic with multilayer structure**

**Fei Yan, Haibo Yang\*, Ying Lin, and Tong Wang**

School of Materials Science and Engineering, Shaanxi University of Science and Technology,

Xi'an, 710021, Weiyang District, Xi'an, China

#### **AUTHOR INFORMATION**

**Corresponding Author (\*Haibo Yang)**

E-mail: yanghaibo@sust.edu.cn

Table S1 Comparison the energy storage properties of lead free ceramics that prepared by  
different methods

| Methods                                | Composition                                                                                                                                                                               | $W_{rec}$<br>(J/cm <sup>3</sup> ) | $E_b$<br>(kV/cm) | $\eta$<br>(%) | Ref.      |
|----------------------------------------|-------------------------------------------------------------------------------------------------------------------------------------------------------------------------------------------|-----------------------------------|------------------|---------------|-----------|
| Ion substitutions<br>or solid solution | $\text{Na}_{1/2}(\text{Bi}_{0.98}\text{Gd}_{0.02})_{1/2}\text{TiO}_3$                                                                                                                     | 0.85                              | 90               | 65            | [40]      |
|                                        | $[\text{Bi}_{0.5}(\text{Na}_{0.82}\text{K}_{0.18})_{0.5}]_{0.97}\text{La}_{0.03}\text{Ti}_{0.97}\text{Zr}_{0.03}\text{O}_3$                                                               | 0.84                              | 80               | -             | [41]      |
|                                        | $\text{Bi}_{0.4}\text{La}_{0.1}(\text{Na}_{0.82}\text{K}_{0.18})_{0.5}\text{Ti}_{0.96}\text{Zr}_{0.02}\text{Sn}_{0.02}\text{O}_3$                                                         | 1.95                              | 155              | 71            | [42]      |
|                                        | $0.90(\text{Bi}_{0.5}\text{Na}_{0.5}\text{TiO}_3\text{-BaTiO}_3)\text{-}0.10\text{NaTaO}_3$                                                                                               | 1.2                               | 100              | 74.8          | [32]      |
|                                        | $0.5\text{SrTiO}_3\text{-}0.5(0.95\text{Bi}_{0.5}\text{Na}_{0.5}\text{TiO}_3\text{-}$<br>$0.05\text{BaAl}_{0.5}\text{Nb}_{0.5}\text{O}_3)$                                                | 1.89                              | 190              | 77            | [11]      |
|                                        | $0.75\text{Bi}_{0.5}\text{Na}_{0.5}\text{TiO}_3\text{-}0.25\text{BaSnO}_3$                                                                                                                | 1.91                              | 190              | 86.4          | [43]      |
|                                        | $0.92(0.65\text{BaTiO}_3\text{-}0.35\text{Bi}_{0.5}\text{Na}_{0.5}\text{TiO}_3)\text{-}$<br>$0.08\text{Na}_{0.73}\text{Bi}_{0.09}\text{NbO}_3$                                            | 1.70                              | 172              | 82            | [44]      |
| Additives                              | $0.55\text{Bi}_{0.5}\text{Na}_{0.5}\text{TiO}_3\text{-}$<br>$0.45\text{Ba}_{0.85}\text{Ca}_{0.15}\text{Ti}_{0.85}\text{Zr}_{0.1}\text{Sn}_{0.05}\text{O}_3\text{-}5\text{wt}\%\text{MgO}$ | 1.62                              | 189.7            | 79.51         | [45]      |
|                                        | $0.95(\text{Na}_{0.5}\text{Bi}_{0.5})\text{TiO}_3\text{-}0.05\text{BaTiO}_3\text{+}3\text{ mol}\%(\text{BaO-}$<br>$\text{B}_2\text{O}_3\text{-SiO}_2)$                                    | 0.68                              | 65               | 71            | [46]      |
|                                        | $\text{Bi}_{0.487}\text{Na}_{0.427}\text{K}_{0.06}\text{Ba}_{0.026}\text{TiO}_3\text{-}x\text{ wt}\%\text{CeO}_2$                                                                         | 0.94                              | 75               | 54            | [13]      |
| Composites                             | $\text{SrTiO}_3/((0.94\text{Bi}_{0.5}\text{Na}_{0.5}\text{TiO}_3\text{-}0.06\text{BaTiO}_3)$                                                                                              | 2.41                              | 237              | 68            | This work |

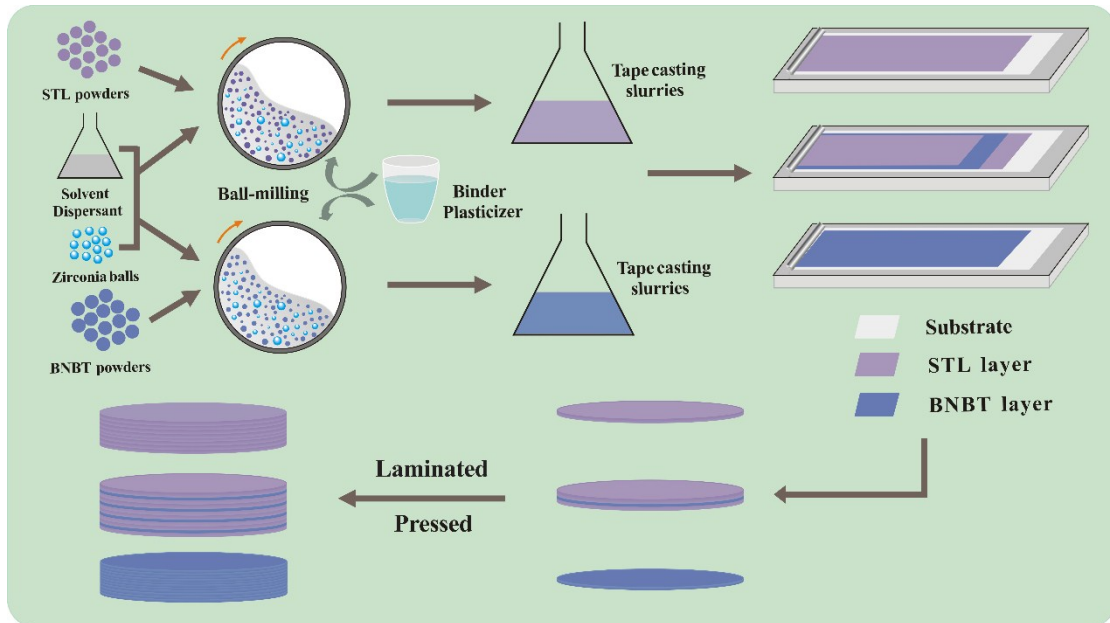

Figure S1 Schematic drawing of the fabrication process for STL ceramic, BNBT ceramic and STL/BNBT multilayer ceramic

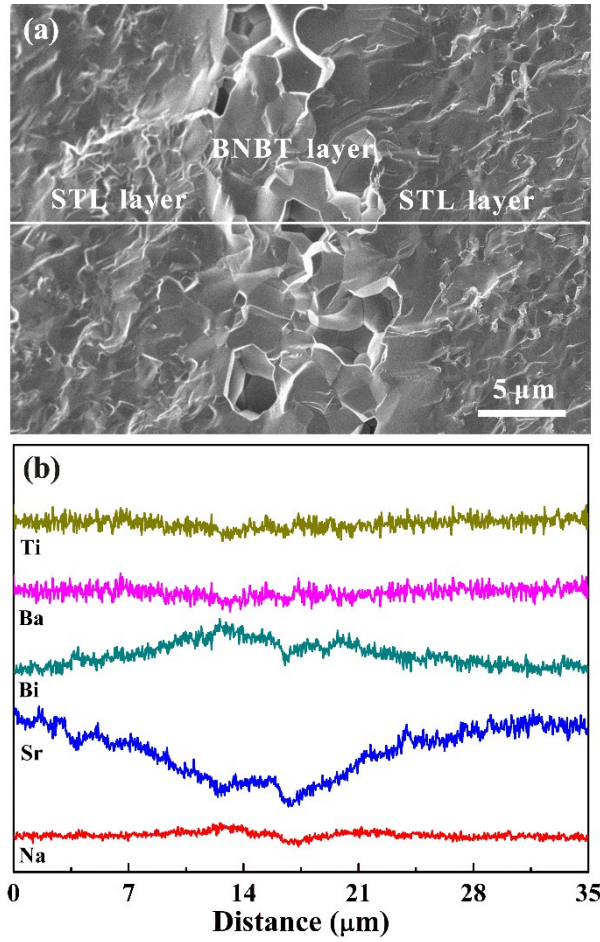

Figure S2(a) SEM and (b) EDS analysis results of STL/BNBT multilayer ceramic

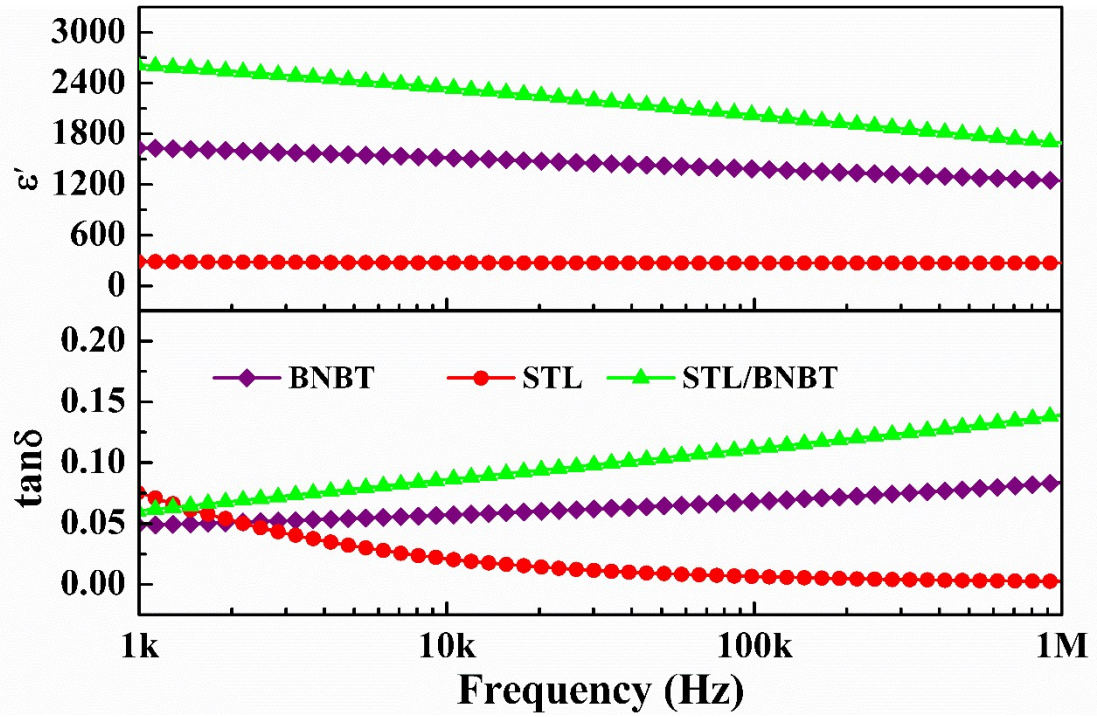

Figure S3 Frequency dependent dielectric constant ( $\epsilon'$ ) and dielectric loss ( $\tan\delta$ ) for STL ceramic, BNBT ceramic and STL/BNBT multilayer ceramic at room temperature

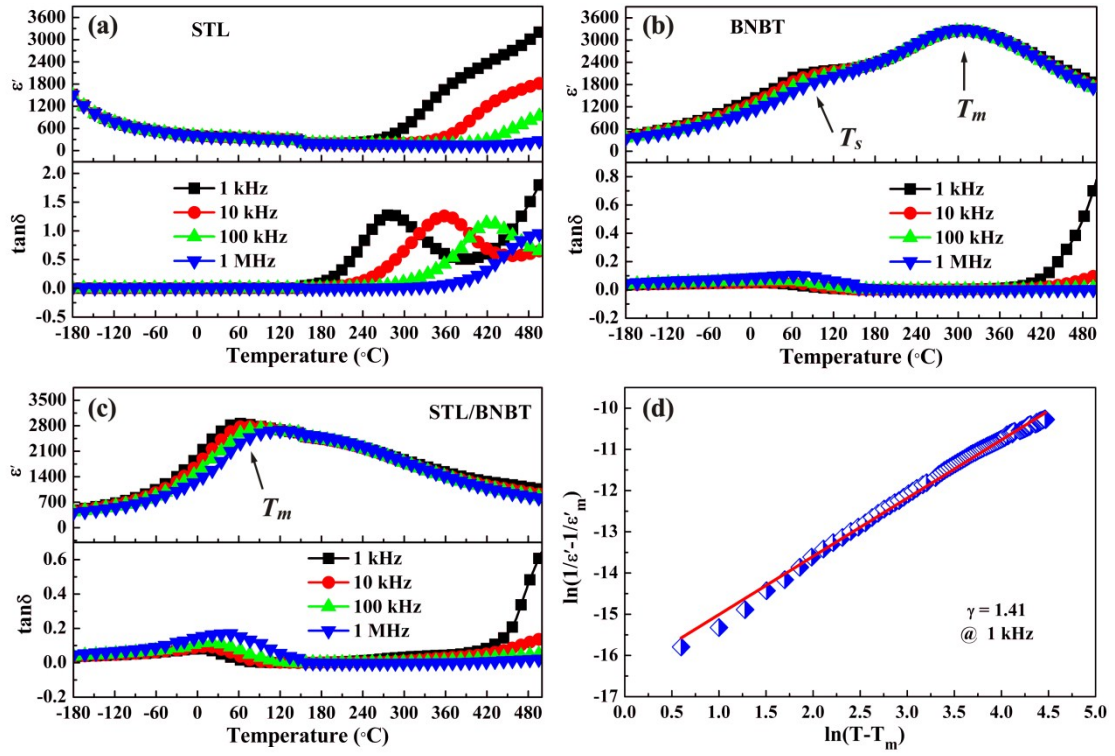

Figure S4(a)-(c) Temperature dependent dielectric constant ( $\epsilon'$ ) and dielectric loss ( $\tan\delta$ ) for STL ceramic, BNBT ceramic and STL/BNBT multilayer ceramic at room temperature from 1 kHz to 1 MHz; (d) Plot of  $\ln(1/\epsilon' - 1/\epsilon'_m)$  as a function of  $\ln(T - T_m)$  for STL/BNBT multilayer ceramic (Symbols: experimental data; solid line: fit)

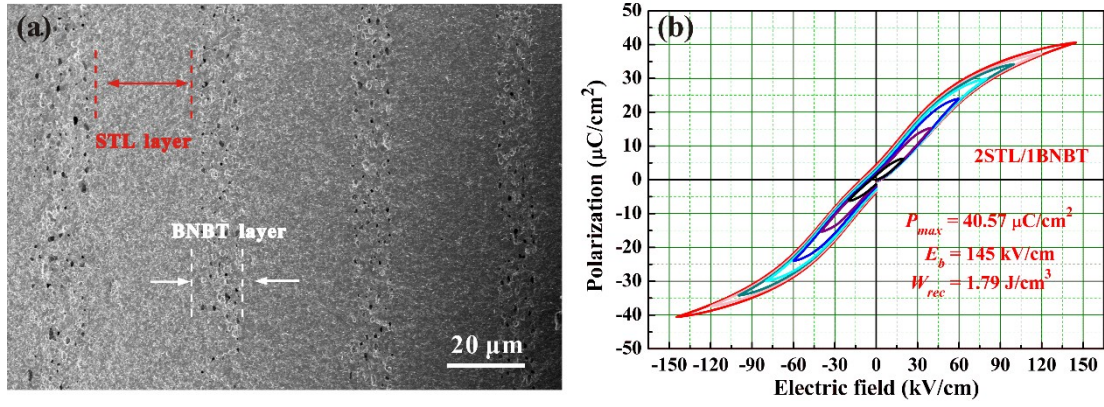

Figure S5 (a) Cross-section image of the 2STL/1BNBT multilayer ceramic; (b)  $P$ - $E$

loops of the 2STL/1BNBT multilayer ceramic
